# Supplementary material
Source: publisher figshare collection journal article supplement (https://frontiersin.figshare.com/ndownloader/files/30917395)
Supplement: Supplementary file 1 [file 30917395]

## Supplementary Material

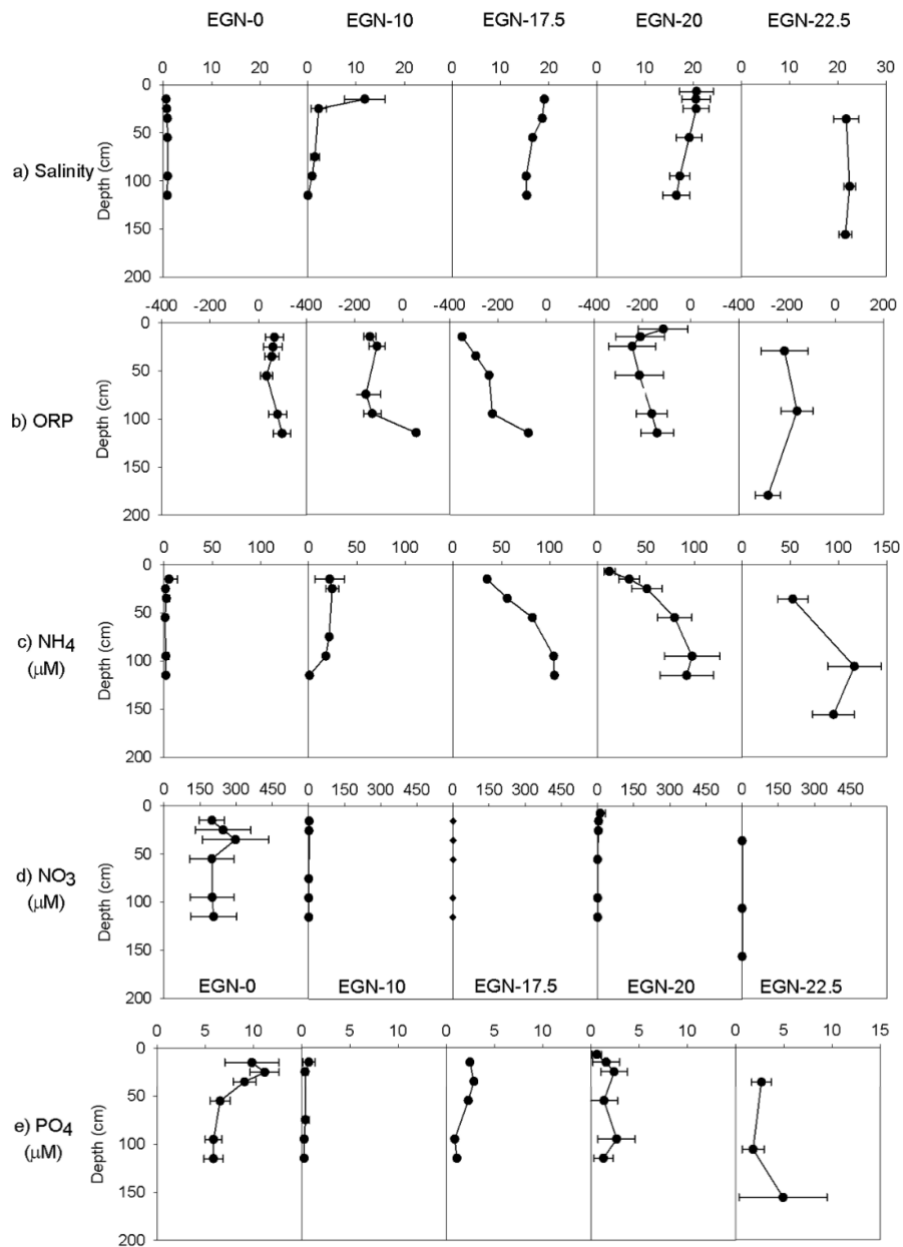

**Supplementary Figure 1.** Depth profiles of nutrient concentrations at EGN for all piezometers during all sampling trips for a) Salinity, b) ORP, c) NH<sub>4</sub>, d) NO<sub>3</sub>, e) PO<sub>4</sub>. Symbols represent average values over the four sampling campaigns, and standard deviations represented by error bars.

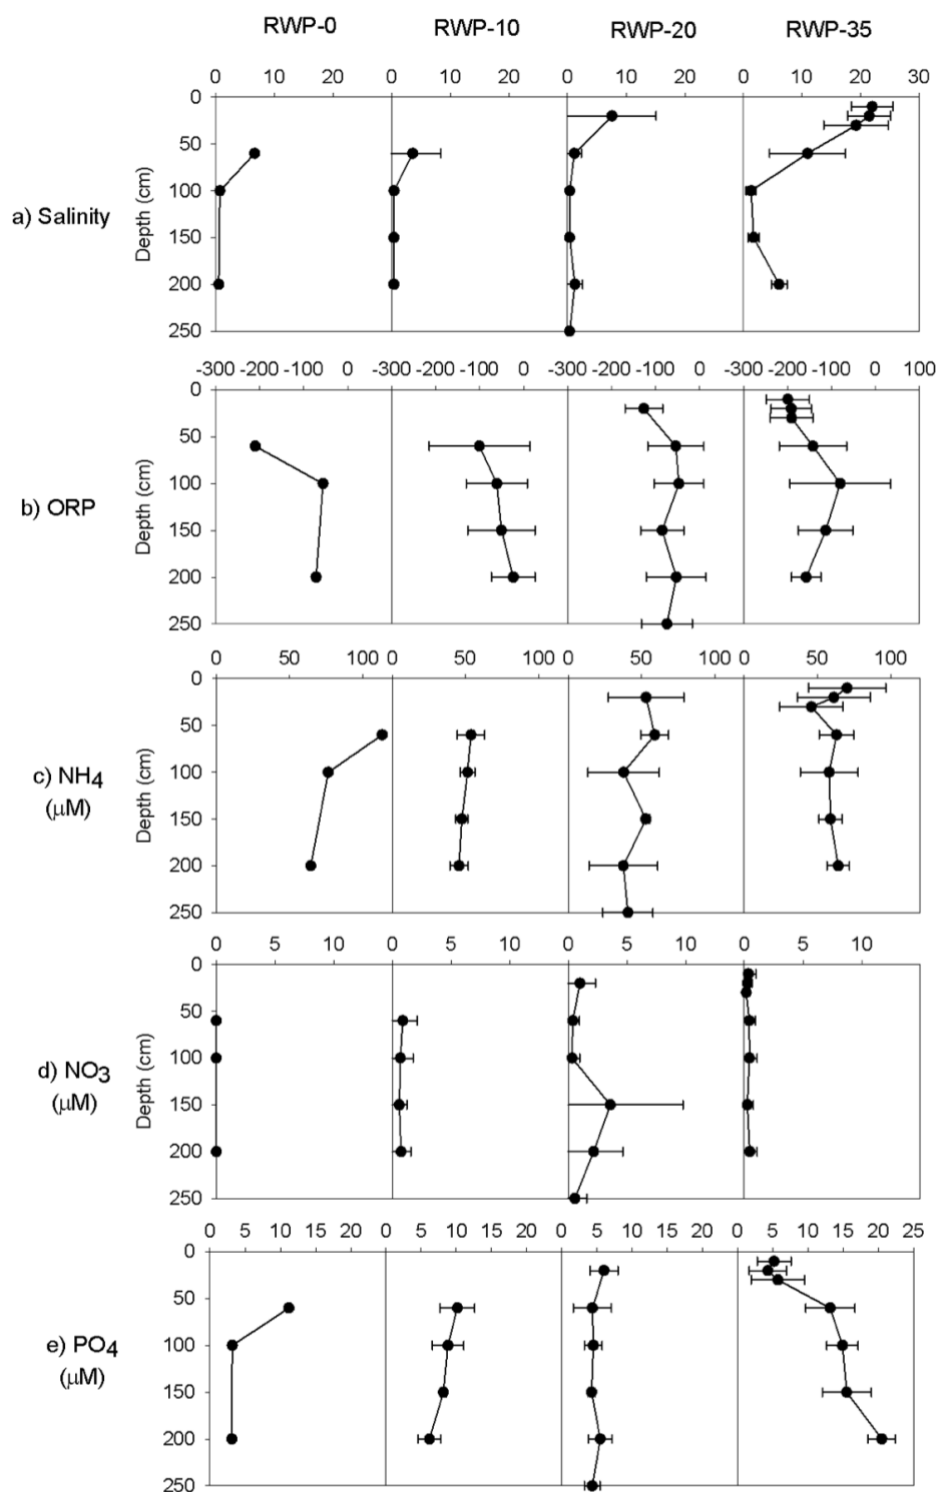

**Supplementary Figure 2.** Depth profiles of nutrient concentrations at RWP for all piezometers during all sampling trips for a) Salinity, b) ORP, c)  $\text{NH}_4$ , d)  $\text{NO}_3$ , e)  $\text{PO}_4$ . Symbols represent average values over the four sampling campaigns, and standard deviations represented by error bars.

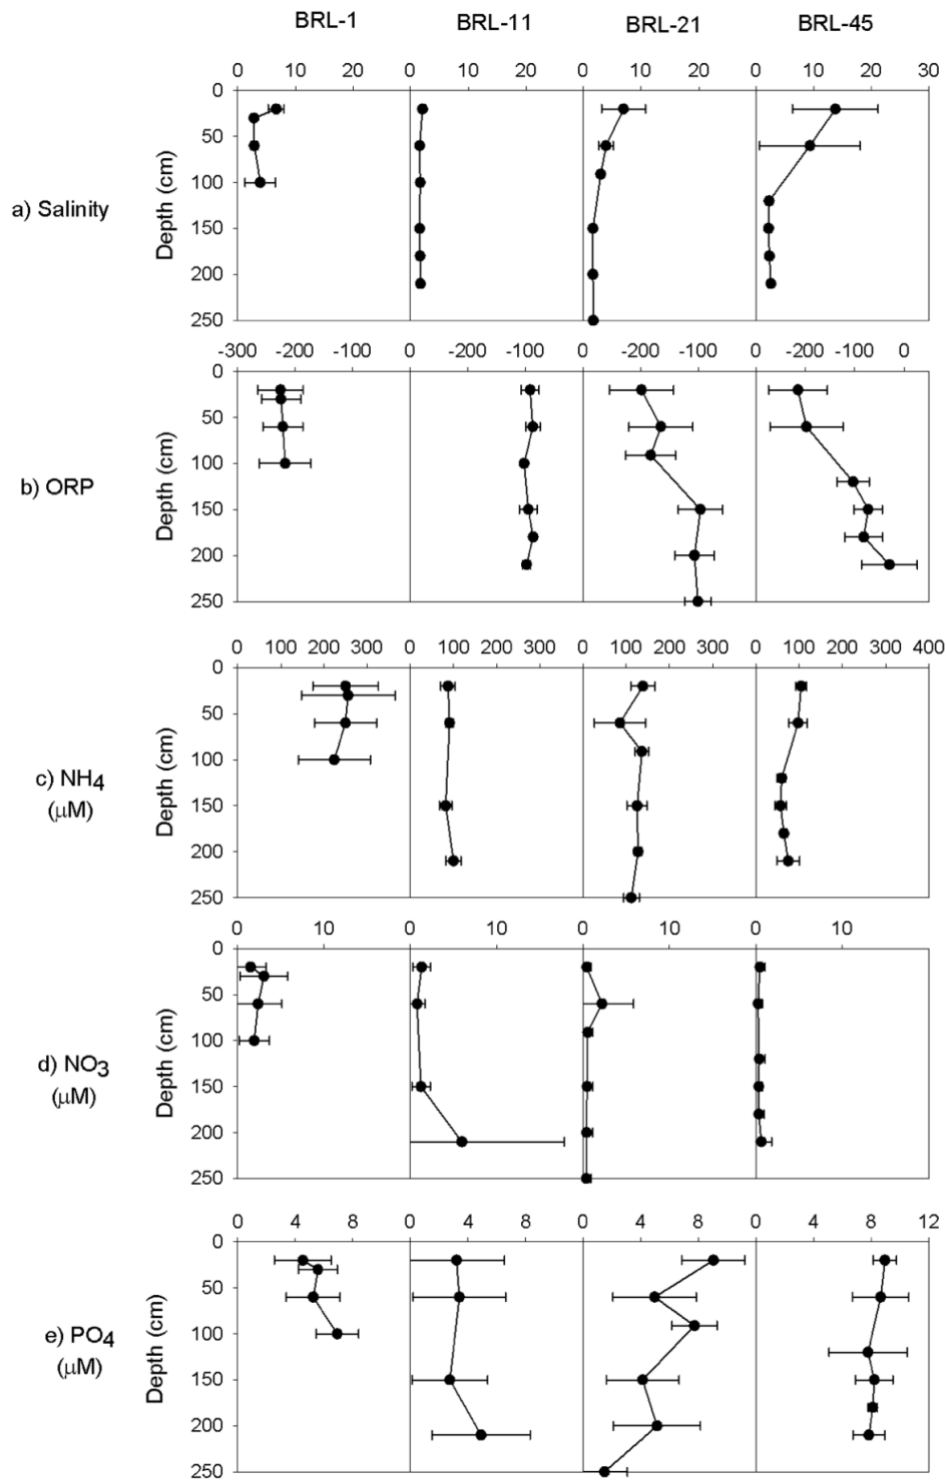

**Supplementary Figure 3.** Depth profiles of nutrient concentrations at BRL for all piezometers during all sampling trips for a) Salinity, b) ORP, c) NH<sub>4</sub>, d) NO<sub>3</sub>, e) PO<sub>4</sub>. Symbols represent average values over the four sampling campaigns, and standard deviations represented by error bars.

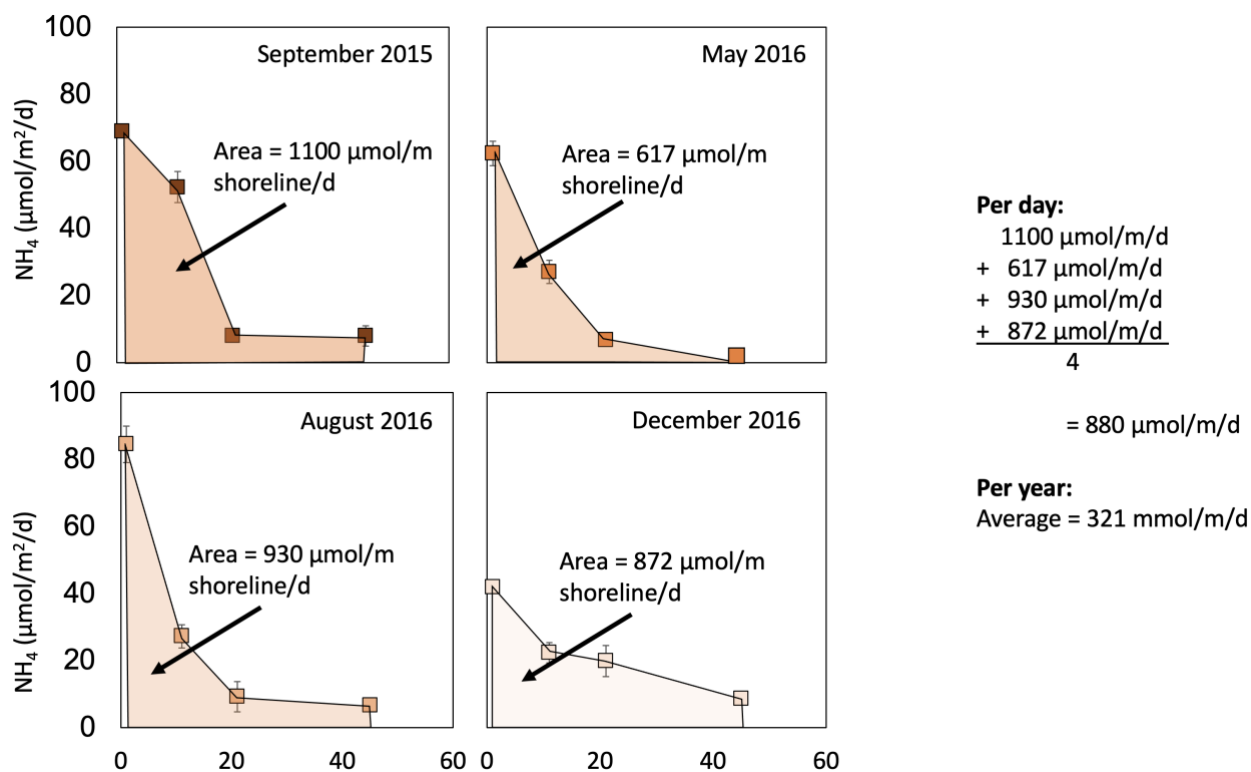

**Supplementary Figure 4:** Example of calculation of yearly total seepage face nutrient fluxes (for BRL  $\text{NH}_4$  fluxes).
